# Supplementary material for: Controllable gelation of artificial extracellular matrix for altering mass transport and improving cancer therapies
Source: PubMed Central journal article supplement (PMC7527557; doi:10.1038/s41467-020-18493-7), 2020-09-30
Supplement: 41467_2020_18493_MOESM2_ESM.pdf [file 41467_2020_18493_MOESM2_ESM.pdf]

## Reporting Summary

Nature Research wishes to improve the reproducibility of the work that we publish. This form provides structure for consistency and transparency in reporting. For further information on Nature Research policies, see [Authors & Referees](#) and the [Editorial Policy Checklist](#).

### Statistical parameters

When statistical analyses are reported, confirm that the following items are present in the relevant location (e.g. figure legend, table legend, main text, or Methods section).

n/a Confirmed

- The exact sample size ( $n$ ) for each experimental group/condition, given as a discrete number and unit of measurement
- An indication of whether measurements were taken from distinct samples or whether the same sample was measured repeatedly
- The statistical test(s) used AND whether they are one- or two-sided  
*Only common tests should be described solely by name; describe more complex techniques in the Methods section.*
- A description of all covariates tested
- A description of any assumptions or corrections, such as tests of normality and adjustment for multiple comparisons
- A full description of the statistics including central tendency (e.g. means) or other basic estimates (e.g. regression coefficient) AND variation (e.g. standard deviation) or associated estimates of uncertainty (e.g. confidence intervals)
- For null hypothesis testing, the test statistic (e.g.  $F$ ,  $t$ ,  $r$ ) with confidence intervals, effect sizes, degrees of freedom and  $P$  value noted  
*Give  $P$  values as exact values whenever suitable.*
- For Bayesian analysis, information on the choice of priors and Markov chain Monte Carlo settings
- For hierarchical and complex designs, identification of the appropriate level for tests and full reporting of outcomes
- Estimates of effect sizes (e.g. Cohen's  $d$ , Pearson's  $r$ ), indicating how they were calculated
- Clearly defined error bars  
*State explicitly what error bars represent (e.g. SD, SE, CI)*

*Our web collection on [statistics for biologists](#) may be useful.*

### Software and code

Policy information about [availability of computer code](#)

Data collection

No software was used.

Data analysis

All statistical analyses were performed on Origin (version 8.6), SPSS (version 22), Graphpad prism (version 7) or Excel 2016. Living image software (Version 4.5) was used to analyse bioluminescent and fluorescent images. Image J (Version 1.48h3) was used for fluorescence-image analysis. Transcriptomics data were analyzed online with I-Sanger Cloud Platform. FlowJo (Version 4.5) was used for flow cytometry analysis. Simca-P (Version 13.0) was used for metabolic analysis. HEML (Version 1.0) was used for heat map drawing.

For manuscripts utilizing custom algorithms or software that are central to the research but not yet described in published literature, software must be made available to editors/reviewers upon request. We strongly encourage code deposition in a community repository (e.g. GitHub). See the Nature Research [guidelines for submitting code & software](#) for further information.

## Data

Policy information about [availability of data](#)

All manuscripts must include a [data availability statement](#). This statement should provide the following information, where applicable:

- Accession codes, unique identifiers, or web links for publicly available datasets
- A list of figures that have associated raw data
- A description of any restrictions on data availability

The source data underlying Figs. 1e, f, 2a-e, h, 3a-b, 4a, h, 5c, f, 6a, c, d, f, j, 7b, d, e and Supplementary Figs. 1, 2, 6-11, and 13-17 are provided as a Source Data file. All the relevant data are available from the authors upon reasonable request. The transcriptomic data are available at NCBI under Project PRJNA629444 [[https://www.ncbi.nlm.nih.gov/Traces/study/?acc=PRJNA629444&o=acc\\_s%3Aa](https://www.ncbi.nlm.nih.gov/Traces/study/?acc=PRJNA629444&o=acc_s%3Aa)]. A reporting summary for this article is available as a Supplementary Information file.

## Field-specific reporting

Please select the best fit for your research. If you are not sure, read the appropriate sections before making your selection.

- Life sciences       Behavioural & social sciences       Ecological, evolutionary & environmental sciences

For a reference copy of the document with all sections, see [nature.com/authors/policies/ReportingSummary-flat.pdf](https://www.nature.com/authors/policies/ReportingSummary-flat.pdf)

## Life sciences study design

All studies must disclose on these points even when the disclosure is negative.

|                 |                                                                                                                                                                                                                                                                                                                                                                                          |
|-----------------|------------------------------------------------------------------------------------------------------------------------------------------------------------------------------------------------------------------------------------------------------------------------------------------------------------------------------------------------------------------------------------------|
| Sample size     | No sample size calculation was performed. Sample sizes were determined according to previous experimental experience. The sample sizes of in vitro experiments refers to previously published literature (Nature Nanotechnology, 2019, 14, 89-97). The sample sizes of in vivo experiments refers to previously published literature ( Nature Biomedical Engineering, 2018, 2, 611-621). |
| Data exclusions | No data were excluded.                                                                                                                                                                                                                                                                                                                                                                   |
| Replication     | All experimental data are given including replicates. Details of experimental replicates are given in the figure legends. All reported attempts at replication were successful.                                                                                                                                                                                                          |
| Randomization   | All samples/organisms were randomly allocated into experimental groups.                                                                                                                                                                                                                                                                                                                  |
| Blinding        | Blinding was applied to all experiments.                                                                                                                                                                                                                                                                                                                                                 |

## Reporting for specific materials, systems and methods

### Materials & experimental systems

| n/a                                 | Involvement in the study                                        |
|-------------------------------------|-----------------------------------------------------------------|
| <input checked="" type="checkbox"/> | <input type="checkbox"/> Unique biological materials            |
| <input type="checkbox"/>            | <input checked="" type="checkbox"/> Antibodies                  |
| <input type="checkbox"/>            | <input checked="" type="checkbox"/> Eukaryotic cell lines       |
| <input checked="" type="checkbox"/> | <input type="checkbox"/> Palaeontology                          |
| <input type="checkbox"/>            | <input checked="" type="checkbox"/> Animals and other organisms |
| <input checked="" type="checkbox"/> | <input type="checkbox"/> Human research participants            |

### Methods

| n/a                                 | Involvement in the study                           |
|-------------------------------------|----------------------------------------------------|
| <input checked="" type="checkbox"/> | <input type="checkbox"/> ChIP-seq                  |
| <input type="checkbox"/>            | <input checked="" type="checkbox"/> Flow cytometry |
| <input checked="" type="checkbox"/> | <input type="checkbox"/> MRI-based neuroimaging    |

## Antibodies

|                 |                                                                                                                                                                                                                                                                                                                                                                                                                                                                                                                                                                                                                                                                                                                                                                                                                                                                                                                                                                                                                                                                                                                                                                                                                                                                                                                                                                                                                                                                                                                                                                                                                                                                                                                        |
|-----------------|------------------------------------------------------------------------------------------------------------------------------------------------------------------------------------------------------------------------------------------------------------------------------------------------------------------------------------------------------------------------------------------------------------------------------------------------------------------------------------------------------------------------------------------------------------------------------------------------------------------------------------------------------------------------------------------------------------------------------------------------------------------------------------------------------------------------------------------------------------------------------------------------------------------------------------------------------------------------------------------------------------------------------------------------------------------------------------------------------------------------------------------------------------------------------------------------------------------------------------------------------------------------------------------------------------------------------------------------------------------------------------------------------------------------------------------------------------------------------------------------------------------------------------------------------------------------------------------------------------------------------------------------------------------------------------------------------------------------|
| Antibodies used | The primary antibodies for immunofluorescence were anti-Ki-67 rabbit monoclonal antibody (GB11030, dilution: 1:200) from Servicebio, anti-alpha smooth muscle actin antibody [E184] (ab32575, dilution: 1:200), anti-CD31 antibody [P2B1] (ab24590, dilution: 1:200), and anti-glucose transporter GLUT1 antibody [EPR3915] (ab115730, dilution: 1:200) from Abcam. Fibrinogen alpha chain polyclonal antibody (20645-1-AP, dilution: 1:100) was purchased from Proteintech. FITC anti-mouse CD3 antibody [17A2] (100203, 5 µg mL <sup>-1</sup> ), PE anti-mouse CD4 antibody [GK1.5] (100407, 2.5 µg mL <sup>-1</sup> ), and APC anti-mouse CD8a antibody [53-6.71] (100711, 2.5 µg mL <sup>-1</sup> ) were purchased from Biolegend.                                                                                                                                                                                                                                                                                                                                                                                                                                                                                                                                                                                                                                                                                                                                                                                                                                                                                                                                                                                 |
| Validation      | All antibodies were validated by the commercial supplier. All validation statements can be found on the respective antibody website:<br>Anti-Ki-67 rabbit monoclonal antibody <a href="https://www.servicebio.cn/goodsdetail?id=1331">https://www.servicebio.cn/goodsdetail?id=1331</a><br>Anti-alpha smooth muscle actin antibody<br><a href="https://www.abcam.com/alpha-smooth-muscle-actin-antibody-e184-ab32575.html">https://www.abcam.com/alpha-smooth-muscle-actin-antibody-e184-ab32575.html</a><br>Fibrinogen alpha chain polyclonal antibody<br><a href="https://www.ptgcn.com/Products/Fibrinogen-alpha-chain-Antibody-20645-1-AP.htm">https://www.ptgcn.com/Products/Fibrinogen-alpha-chain-Antibody-20645-1-AP.htm</a><br>Anti-glucose transporter GLUT1 antibody<br><a href="https://www.abcam.com/glucose-transporter-glut1-antibody-epr3915-ab115730.html">https://www.abcam.com/glucose-transporter-glut1-antibody-epr3915-ab115730.html</a><br>Anti-CD31 antibody<br><a href="https://www.abcam.com/cd31-antibody-p2b1-ab24590.html">https://www.abcam.com/cd31-antibody-p2b1-ab24590.html</a><br>PE anti-mouse CD4 antibody<br><a href="https://www.biolegend.com/en-us/products/pe-Anti-mouse-cd4-Antibody-250">https://www.biolegend.com/en-us/products/pe-Anti-mouse-cd4-Antibody-250</a><br>FITC anti-mouse CD3 antibody<br><a href="https://www.biolegend.com/en-us/products/fic-Anti-mouse-cd3-Antibody-45">https://www.biolegend.com/en-us/products/fic-Anti-mouse-cd3-Antibody-45</a><br>APC anti-mouse CD8a antibody<br><a href="https://www.biolegend.com/en-us/products/apc-anti-mouse-cd8a-antibody-150">https://www.biolegend.com/en-us/products/apc-anti-mouse-cd8a-antibody-150</a> |

## Eukaryotic cell lines

Policy information about [cell lines](#)

|                                                                      |                                                                                                                                                                         |
|----------------------------------------------------------------------|-------------------------------------------------------------------------------------------------------------------------------------------------------------------------|
| Cell line source(s)                                                  | CT26 colon cancer cells, HT29 colon cancer cells, MCF-7 breast cancer cells and 4T1 breast cancer cells were all obtained from American type culture collection (ATCC). |
| Authentication                                                       | The cell lines were not authenticated.                                                                                                                                  |
| Mycoplasma contamination                                             | All cell lines were tested for mycoplasma contamination. No mycoplasma contamination was found.                                                                         |
| Commonly misidentified lines<br>(See <a href="#">ICLAC</a> register) | No commonly misidentified cell lines were used.                                                                                                                         |

## Animals and other organisms

Policy information about [studies involving animals](#); [ARRIVE guidelines](#) recommended for reporting animal research

|                         |                                                                                                                                                                                                                                                                                                                                                                                         |
|-------------------------|-----------------------------------------------------------------------------------------------------------------------------------------------------------------------------------------------------------------------------------------------------------------------------------------------------------------------------------------------------------------------------------------|
| Laboratory animals      | Six-week-old Balb/c female mice (18 ± 2g) and eight-week old male C57BL/6J-ApcMin/+ mice were used for study. Animals were housed in groups of 4-6 mice per individually ventilated cage in a 12 h light dark cycle (06:30-18:30 light; 18:30-06:30 dark), with constant room temperature (21 ± 1 °C) and relative humidity (40-60 %). Animals had access to food and water ad libitum. |
| Wild animals            | The study did not involve wild animals studies.                                                                                                                                                                                                                                                                                                                                         |
| Field-collected samples | The study did not involve field-collection samples.                                                                                                                                                                                                                                                                                                                                     |

## Flow Cytometry

### Plots

Confirm that:

- The axis labels state the marker and fluorochrome used (e.g. CD4-FITC).
- The axis scales are clearly visible. Include numbers along axes only for bottom left plot of group (a 'group' is an analysis of identical markers).
- All plots are contour plots with outliers or pseudocolor plots.
- A numerical value for number of cells or percentage (with statistics) is provided.

## Methodology

Sample preparation

Before staining, the cells were incubated with mouse anti-CD16/32 mAb to block non-specific Fc binding. Then, cells were stained with FITC anti-mouse CD3 Antibody, PE anti-mouse CD4 antibody, and APC anti-mouse CD8a antibody. Unstained cells and cells stained with CD3 were used as controls.

Instrument

Facscalibur (BD, Accuri C6)

Software

FlowJo\_V10

Cell population abundance

No post-sort fractions were collected through the Flow cytometry.

Gating strategy

The gating strategy was detailly exhibited in Figure S18. CD8+CD4- cells were gating on CD3+ lymphocytes.

Tick this box to confirm that a figure exemplifying the gating strategy is provided in the Supplementary Information.
